# Supplementary material
Source: MDPI journal article supplement (https://www.mdpi.com/2227-9717/10/9/1735)
Supplement: s1 [file s1]

# Exploration of the Potential Targets and Molecular Mechanism of *Carthamus tinctorius* L. for Liver Fibrosis Based on Network Pharmacology and Molecular Docking Strategy

Table S1. The bioactive components and treating targets of HH.

| components               | Tar-gets | Uni-prot ID | components   | Targets         | Uniprot ID    |
|--------------------------|----------|-------------|--------------|-----------------|---------------|
| poriferast-5-en-3beta-ol | HMG CR   | P04035      | phytofluene  | ACACB           | O00763        |
| poriferast-5-en-3beta-ol | CYP51A1  | Q16850      | phytofluene  | FAAH            | O00519        |
| poriferast-5-en-3beta-ol | AR       | P10275      | phytofluene  | KDR             | P35968        |
| poriferast-5-en-3beta-ol | NPC1L1   | Q9UHC9      | phytofluene  | FGFR1           | P11362        |
| poriferast-5-en-3beta-ol | NR1H3    | Q13133      | phytofluene  | PLA2G2A         | P14555        |
| poriferast-5-en-3beta-ol | CYP17A1  | P05093      | phytofluene  | PTGS2           | P35354        |
| poriferast-5-en-3beta-ol | RORC     | P51449      | phytofluene  | TRPV1           | Q8NER1        |
| poriferast-5-en-3beta-ol | CYP19A1  | P11511      | Pyrethrin II | GRM5            | P41594        |
| poriferast-5-en-3beta-ol | ESR2     | Q92731      | Pyrethrin II | HCRTR2          | O43614        |
| poriferast-5-en-3beta-ol | ESR1     | P03372      | Pyrethrin II | HCRTR1          | O43613        |
| poriferast-5-en-3beta-ol | SHBG     | P04278      | Pyrethrin II | CAPN1           | P07384        |
| poriferast-5-en-3beta-ol | SREBF2   | Q12772      | Pyrethrin II | MAPK8           | P45983        |
| poriferast-5-en-3beta-ol | CYP2C19  | P33261      | Pyrethrin II | MAPK10          | P53779        |
| poriferast-5-en-3beta-ol | SLC6A2   | P23975      | Pyrethrin II | SCN9A           | Q15858        |
| poriferast-5-en-3beta-ol | BCHE     | P06276      | Pyrethrin II | PTGER1          | P34995        |
| Flavoxanthin             | VDR      | P11473      | Pyrethrin II | CFD             | P00746        |
| Flavoxanthin             | ALOX5    | P09917      | Pyrethrin II | CAPN1<br>CAPNS1 | P07384 P04632 |
| Flavoxanthin             | PRKCG    | P05129      | Pyrethrin II | CTSL            | P07711        |
| Flavoxanthin             | PRKCB    | P05771      | Pyrethrin II | CTSS            | P25774        |
| Flavoxanthin             | CHEK1    | O14757      | Pyrethrin II | PARP1           | P09874        |
| Flavoxanthin             | GLS      | O94925      | Pyrethrin II | CTSB            | P07858        |
| Flavoxanthin             | ACHE     | P22303      | Pyrethrin II | PPARG           | P37231        |

|                                                                                                                  |        |        |                     |         |        |
|------------------------------------------------------------------------------------------------------------------|--------|--------|---------------------|---------|--------|
| Flavoxanthin                                                                                                     | BCL2   | P10415 | 6-Hydroxykaempferol | AKR1B1  | P15121 |
| Flavoxanthin                                                                                                     | SF3B3  | Q15393 | 6-Hydroxykaempferol | NOX4    | Q9NPH5 |
| Flavoxanthin                                                                                                     | CHRM5  | P08912 | 6-Hydroxykaempferol | XDH     | P47989 |
| Flavoxanthin                                                                                                     | CHRM2  | P08172 | 6-Hydroxykaempferol | FLT3    | P36888 |
| Flavoxanthin                                                                                                     | ENPP2  | Q13822 | 6-Hydroxykaempferol | CA2     | P00918 |
| Flavoxanthin                                                                                                     | CHRM4  | P08173 | 6-Hydroxykaempferol | ALOX5   | P09917 |
| Flavoxanthin                                                                                                     | CHRM1  | P11229 | 6-Hydroxykaempferol | CA7     | P43166 |
| Flavoxanthin                                                                                                     | CHRM3  | P20309 | 6-Hydroxykaempferol | HSD17B2 | P37059 |
| 4-[(E)-4-(3,5-dimethoxy-4-oxo-1-cyclohexa-2,5-dienylidene)but-2-enylidene]-2,6-dimethoxycyclohexa-2,5-dien-1-one | CHRM2  | P08172 | 6-Hydroxykaempferol | ABCC1   | P33527 |
| 4-[(E)-4-(3,5-dimethoxy-4-oxo-1-cyclohexa-2,5-dienylidene)but-2-enylidene]-2,6-dimethoxycyclohexa-2,5-dien-1-one | CHRM1  | P11229 | 6-Hydroxykaempferol | CA12    | O43570 |
| 4-[(E)-4-(3,5-dimethoxy-4-oxo-1-cyclohexa-2,5-dienylidene)but-2-enylidene]-2,6-dimethoxycyclohexa-2,5-dien-1-one | TAAR1  | Q96RJ0 | 6-Hydroxykaempferol | ABCB1   | P08183 |
| 4-[(E)-4-(3,5-dimethoxy-4-oxo-1-cyclohexa-2,5-dienylidene)but-2-enylidene]-2,6-dimethoxycyclohexa-2,5-dien-1-one | PDE10A | Q9Y233 | 6-Hydroxykaempferol | CYP1B1  | Q16678 |
| 4-[(E)-4-(3,5-dimethoxy-4-oxo-1-cyclohexa-2,5-dienylidene)but-2-enylidene]-2,6-dimethoxycyclohexa-2,5-dien-1-one | FAP    | Q12884 | 6-Hydroxykaempferol | ABCG2   | Q9UNQ0 |
| 4-[(E)-4-(3,5-dimethoxy-4-oxo-1-cyclohexa-2,5-dienylidene)but-2-enylidene]-2,6-dimethoxycyclohexa-2,5-dien-1-one | EZR    | P15311 | 6-Hydroxykaempferol | PFKFB3  | Q16875 |
| 4-[(E)-4-(3,5-dimethoxy-4-oxo-1-cyclohexa-2,5-dienylidene)but-2-enylidene]-2,6-dimethoxycyclohexa-2,5-dien-1-one | ABCB1  | P08183 | 6-Hydroxykaempferol | ADORA1  | P30542 |
| 4-[(E)-4-(3,5-dimethoxy-4-oxo-1-cyclohexa-2,5-dienylidene)but-2-enylidene]-2,6-dimethoxycyclohexa-2,5-dien-1-one | PTGS2  | P35354 | baicalein           | KDM4E   | B2RXH2 |
| 4-[(E)-4-(3,5-dimethoxy-4-oxo-1-cyclohexa-2,5-dienylidene)but-2-enylidene]-2,6-dimethoxycyclohexa-2,5-dien-1-one | ABCC1  | P33527 | baicalein           | XDH     | P47989 |
| 4-[(E)-4-(3,5-dimethoxy-4-oxo-1-cyclohexa-2,5-dienylidene)but-2-enylidene]-2,6-dimethoxycyclohexa-2,5-dien-1-one | PREP   | P48147 | baicalein           | ALOX15  | P16050 |
| 4-[(E)-4-(3,5-dimethoxy-4-oxo-1-cyclohexa-2,5-dienylidene)but-2-enylidene]-2,6-dimethoxycyclohexa-2,5-dien-1-one | MET    | P08581 | baicalein           | CDK1    | P06493 |
| 4-[(E)-4-(3,5-dimethoxy-4-oxo-1-cyclohexa-2,5-dienylidene)but-2-enylidene]-2,6-dimethoxycyclohexa-2,5-dien-1-one | SCN9A  | Q15858 | baicalein           | ALOX12  | P18054 |
| 4-[(E)-4-(3,5-dimethoxy-4-oxo-1-cyclohexa-2,5-dienylidene)but-2-enylidene]-2,6-dimethoxycyclohexa-2,5-dien-1-one | FKBP1A | P62942 | baicalein           | GRK6    | P43250 |
| 4-[(E)-4-(3,5-dimethoxy-4-oxo-1-cyclohexa-2,5-dienylidene)but-2-enylidene]-2,6-dimethoxycyclohexa-2,5-dien-1-one | HTR2A  | P28223 | baicalein           | CYP19A1 | P11511 |

|                                                                                                                  |         |        |                     |                |                  |
|------------------------------------------------------------------------------------------------------------------|---------|--------|---------------------|----------------|------------------|
| 4-[(E)-4-(3,5-dimethoxy-4-oxo-1-cyclohexa-2,5-dienylidene)but-2-enylidene]-2,6-dimethoxycyclohexa-2,5-dien-1-one | PIM1    | P11309 | baicalein           | CA7            | P43166           |
| lignan                                                                                                           | NR3C1   | P04150 | baicalein           | CA12           | O43570           |
| lignan                                                                                                           | PDE5A   | O76074 | baicalein           | CA4            | P22748           |
| lignan                                                                                                           | SYK     | P43405 | baicalein           | ABCB1          | P08183           |
| lignan                                                                                                           | CYP2C9  | P11712 | baicalein           | CYP1B1         | Q16678           |
| lignan                                                                                                           | CYP2C19 | P33261 | baicalein           | HSD17B1        | P14061           |
| lignan                                                                                                           | TRPV1   | Q8NER1 | baicalein           | AKR1B1         | P15121           |
| lignan                                                                                                           | MTO     | P42345 | baicalein           | CDK5R1<br>CDK5 | Q15078<br>Q00535 |
| lignan                                                                                                           | PIK3CA  | P42336 | qt_carthamone       | IGFBP3         | P17936           |
| lignan                                                                                                           | RORC    | P51449 | qt_carthamone       | AKR1C3         | P42330           |
| lignan                                                                                                           | PDE7A   | Q13946 | qt_carthamone       | NOX4           | Q9NPH5           |
| lignan                                                                                                           | CYP3A4  | P08684 | qt_carthamone       | CAMKK2         | Q96RR4           |
| lignan                                                                                                           | CHRM2   | P08172 | qt_carthamone       | LCK            | P06239           |
| lignan                                                                                                           | BRD2    | P25440 | qt_carthamone       | SELL           | P14151           |
| lignan                                                                                                           | CFD     | P00746 | qt_carthamone       | SELE           | P16581           |
| lignan                                                                                                           | CDK2    | P24941 | qt_carthamone       | SELP           | P16109           |
| lupeol-palmitate                                                                                                 | HSD11B1 | P28845 | qt_carthamone       | MMP16          | P51512           |
| lupeol-palmitate                                                                                                 | F2      | P00734 | qt_carthamone       | MMP13          | P45452           |
| lupeol-palmitate                                                                                                 | PRSS1   | P07477 | qt_carthamone       | MMP1           | P03956           |
| lupeol-palmitate                                                                                                 | CTRC    | Q99895 | qt_carthamone       | MMP2           | P08253           |
| lupeol-palmitate                                                                                                 | PTPN1   | P18031 | qt_carthamone       | MMP14          | P50281           |
| lupeol-palmitate                                                                                                 | VDR     | P11473 | qt_carthamone       | MMP8           | P22894           |
| lupeol-palmitate                                                                                                 | PREP    | P48147 | qt_carthamone       | AKR1B1         | P15121           |
| lupeol-palmitate                                                                                                 | CDC25A  | P30304 | 6-Hydroxynaringenin | CYP19A1        | P11511           |
| lupeol-palmitate                                                                                                 | PTGES   | O14684 | 6-Hydroxynaringenin | CA7            | P43166           |
| lupeol-palmitate                                                                                                 | TOP2A   | P11388 | 6-Hydroxynaringenin | CA12           | O43570           |
| lupeol-palmitate                                                                                                 | PTGS2   | P35354 | 6-Hydroxynaringenin | CA4            | P22748           |
| lupeol-palmitate                                                                                                 | AR      | P10275 | 6-Hydroxynaringenin | CYP1B1         | Q16678           |

|                                                      |         |        |                                                      |          |        |
|------------------------------------------------------|---------|--------|------------------------------------------------------|----------|--------|
| lupeol-palmitate                                     | CYP17A1 | P05093 | 6-Hydroxynaringenin                                  | ESR1     | P03372 |
| lupeol-palmitate                                     | HMGCR   | P04035 | 6-Hydroxynaringenin                                  | MAOB     | P27338 |
| lupeol-palmitate                                     | CYP19A1 | P11511 | 6-Hydroxynaringenin                                  | PTGS1    | P23219 |
| Phytoene                                             | ADORA1  | P30542 | 6-Hydroxynaringenin                                  | HSD17B1  | P14061 |
| Phytoene                                             | ADORA2A | P29274 | 6-Hydroxynaringenin                                  | TAS2R31  | P59538 |
| Phytoene                                             | ADORA3  | P0DMS8 | 6-Hydroxynaringenin                                  | ESR2     | Q92731 |
| Phytoene                                             | SPHK2   | Q9NRA0 | 6-Hydroxynaringenin                                  | ABCC1    | P33527 |
| Phytoene                                             | RBP4    | P02753 | 6-Hydroxynaringenin                                  | SHBG     | P04278 |
| Phytoene                                             | PPARA   | Q07869 | 6-Hydroxynaringenin                                  | CBR1     | P16152 |
| Phytoene                                             | DNM1    | Q05193 | 6-Hydroxynaringenin                                  | ABCG2    | Q9UNQ0 |
| Phytoene                                             | MOGAT2  | Q3SYC2 | quercetagenin                                        | PIM1     | P11309 |
| Phytoene                                             | ENPP2   | Q13822 | quercetagenin                                        | AKR1B1   | P15121 |
| Phytoene                                             | TACR3   | P29371 | quercetagenin                                        | MAPT     | P10636 |
| Phytoene                                             | BDKRB2  | P30411 | quercetagenin                                        | KDM4E    | B2RXH2 |
| Phytoene                                             | HDAC1   | Q13547 | quercetagenin                                        | GPR35    | Q9HC97 |
| Phytoene                                             | HDAC4   | P56524 | quercetagenin                                        | TOP2A    | P11388 |
| Phytoene                                             | NPY5R   | Q15761 | quercetagenin                                        | XDH      | P47989 |
| Phytoene                                             | TOP2A   | P11388 | quercetagenin                                        | FLT3     | P36888 |
| phytofluene                                          | ADORA1  | P30542 | quercetagenin                                        | INSR     | P06213 |
| phytofluene                                          | ADORA2A | P29274 | quercetagenin                                        | ACHE     | P22303 |
| phytofluene                                          | ADORA3  | P0DMS8 | quercetagenin                                        | GLO1     | Q04760 |
| phytofluene                                          | SPHK2   | Q9NRA0 | quercetagenin                                        | MYLK     | Q15746 |
| phytofluene                                          | RBP4    | P02753 | quercetagenin                                        | SYK      | P43405 |
| phytofluene                                          | DNM1    | Q05193 | quercetagenin                                        | ABCC1    | P33527 |
| phytofluene                                          | CNR1    | P21554 | quercetagenin                                        | PIK3CG   | P48736 |
| phytofluene                                          | ENPP2   | Q13822 | 7,8-dimethyl-1H-pyrimido[5,6-g]quinoxaline-2,4-dione | CHEK1    | O14757 |
| 7,8-dimethyl-1H-pyrimido[5,6-g]quinoxaline-2,4-dione | PARP14  | Q460N5 | 7,8-dimethyl-1H-pyrimido[5,6-g]quinoxaline-2,4-dione | CYP11B2  | P19099 |
| 7,8-dimethyl-1H-pyrimido[5,6-g]quinoxaline-2,4-      | PARP    | Q460   | 7,8-dimethyl-1H-                                     | HSP90AA1 | P07900 |

|                                                      |               |                  |                                                      |                                 |                                   |
|------------------------------------------------------|---------------|------------------|------------------------------------------------------|---------------------------------|-----------------------------------|
| dione                                                | 15            | N3               | pyrimido[5,6-g]quinoxaline-2,4-dione                 |                                 |                                   |
| 7,8-dimethyl-1H-pyrimido[5,6-g]quinoxaline-2,4-dione | PARP10        | Q53GL7           | 7,8-dimethyl-1H-pyrimido[5,6-g]quinoxaline-2,4-dione | FBP1                            | P09467                            |
| 7,8-dimethyl-1H-pyrimido[5,6-g]quinoxaline-2,4-dione | CCND1<br>CDK4 | P24385<br>P11802 | luteolin                                             | NOX4                            | Q9NPH5                            |
| 7,8-dimethyl-1H-pyrimido[5,6-g]quinoxaline-2,4-dione | HTR2C         | P28335           | luteolin                                             | AKR1B1                          | P15121                            |
| 7,8-dimethyl-1H-pyrimido[5,6-g]quinoxaline-2,4-dione | PARP1         | P09874           | luteolin                                             | CDK5R1<br>CDK5                  | Q15078<br>Q00535                  |
| 7,8-dimethyl-1H-pyrimido[5,6-g]quinoxaline-2,4-dione | GSK3B         | P49841           | luteolin                                             | XDH                             | P47989                            |
| 7,8-dimethyl-1H-pyrimido[5,6-g]quinoxaline-2,4-dione | SIRT2         | Q8IXJ6           | luteolin                                             | MAOA                            | P21397                            |
| 7,8-dimethyl-1H-pyrimido[5,6-g]quinoxaline-2,4-dione | ASAHI         | Q13510           | luteolin                                             | FLT3                            | P36888                            |
| 7,8-dimethyl-1H-pyrimido[5,6-g]quinoxaline-2,4-dione | CISD1         | Q9NZ45           | luteolin                                             | CA2                             | P00918                            |
| 7,8-dimethyl-1H-pyrimido[5,6-g]quinoxaline-2,4-dione | PIK3CD        | O00329           | luteolin                                             | CCNB3<br>CDK1<br>CCNB1<br>CCNB2 | Q8WWL7<br>P06493 P14635<br>O95067 |
| beta-carotene                                        | RBP4          | P02753           | luteolin                                             | ALOX5                           | P09917                            |
| beta-carotene                                        | ADORA1        | P30542           | luteolin                                             | ADORA1                          | P30542                            |
| beta-carotene                                        | ADORA2A       | P29274           | luteolin                                             | CA7                             | P43166                            |
| beta-carotene                                        | ADORA3        | P0DMS8           | luteolin                                             | GLO1                            | Q04760                            |
| beta-carotene                                        | AR            | P10275           | luteolin                                             | APP                             | P05067                            |
| beta-carotene                                        | CYP19A1       | P11511           | luteolin                                             | SYK                             | P43405                            |
| beta-carotene                                        | ESR1          | P03372           | luteolin                                             | GSK3B                           | P49841                            |
| beta-carotene                                        | ESR2          | Q92731           | CLR                                                  | CYP51A1                         | Q16850                            |
| beta-carotene                                        | RORC          | P51449           | CLR                                                  | HMGCR                           | P04035                            |
| beta-carotene                                        | HTR2B         | P41595           | CLR                                                  | CYP17A1                         | P05093                            |
| beta-carotene                                        | RXRB          | P28702           | CLR                                                  | AR                              | P10275                            |
| beta-carotene                                        | ADRA2B        | P18089           | CLR                                                  | ESR2                            | Q92731                            |
| beta-carotene                                        | RARG          | P13631           | CLR                                                  | ESR1                            | P03372                            |
| beta-carotene                                        | RXRG          | P48443           | CLR                                                  | SHBG                            | P04278                            |
| beta-carotene                                        | RARB          | P10826           | CLR                                                  | NR1H3                           | Q13133                            |
| Baicalin                                             | AKR1B1        | P15121           | CLR                                                  | NPC1L1                          | Q9UHC9                            |

|                 |             |            |                            |         |        |
|-----------------|-------------|------------|----------------------------|---------|--------|
| Baicalin        | ADO<br>RA1  | P3054<br>2 | CLR                        | SREBF2  | Q12772 |
| Baicalin        | TNF         | P0137<br>5 | CLR                        | CYP19A1 | P11511 |
| Baicalin        | IL2         | P6056<br>8 | CLR                        | RORC    | P51449 |
| Baicalin        | XDH         | P4798<br>9 | CLR                        | SLC6A4  | P31645 |
| Baicalin        | PTGS<br>2   | P3535<br>4 | CLR                        | SLC6A2  | P23975 |
| Baicalin        | RPS6<br>KA3 | P5181<br>2 | CLR                        | CHRM2   | P08172 |
| Baicalin        | EGFR        | P0053<br>3 | quercetin                  | NOX4    | Q9NPH5 |
| Baicalin        | ACH<br>E    | P2230<br>3 | quercetin                  | AVPR2   | P30518 |
| Baicalin        | NQO<br>2    | P1608<br>3 | quercetin                  | AKR1B1  | P15121 |
| Baicalin        | NMU<br>R2   | Q9GZ<br>Q4 | quercetin                  | XDH     | P47989 |
| Baicalin        | ADR<br>A2A  | P0891<br>3 | quercetin                  | MAOA    | P21397 |
| Baicalin        | ADR<br>A2C  | P1882<br>5 | quercetin                  | IGF1R   | P08069 |
| Baicalin        | NOX4        | Q9NP<br>H5 | quercetin                  | FLT3    | P36888 |
| Baicalin        | ALD<br>H2   | P0509<br>1 | quercetin                  | CYP19A1 | P11511 |
| beta-sitosterol | HMG<br>CR   | P0403<br>5 | quercetin                  | EGFR    | P00533 |
| beta-sitosterol | CYP5<br>1A1 | Q1685<br>0 | quercetin                  | F2      | P00734 |
| beta-sitosterol | AR          | P1027<br>5 | quercetin                  | CA2     | P00918 |
| beta-sitosterol | NPC1<br>L1  | Q9U<br>HC9 | quercetin                  | PIM1    | P11309 |
| beta-sitosterol | NR1H<br>3   | Q1313<br>3 | quercetin                  | ALOX5   | P09917 |
| beta-sitosterol | CYP1<br>7A1 | P0509<br>3 | quercetin                  | AURKB   | Q96GD4 |
| beta-sitosterol | RORC        | P5144<br>9 | quercetin                  | DRD4    | P21917 |
| beta-sitosterol | CYP1<br>9A1 | P1151<br>1 | Hydroxysafflor Yellow<br>A | YARS    | P54577 |
| beta-sitosterol | ESR2        | Q9273<br>1 | Hydroxysafflor Yellow<br>A | MAG     | P20916 |
| beta-sitosterol | ESR1        | P0337<br>2 | Hydroxysafflor Yellow<br>A | CD22    | P20273 |
| beta-sitosterol | SHBG        | P0427<br>8 | Hydroxysafflor Yellow<br>A | CA2     | P00918 |
| beta-sitosterol | SREB<br>F2  | Q1277<br>2 | Hydroxysafflor Yellow<br>A | CA7     | P43166 |
| beta-sitosterol | CYP2<br>C19 | P3326<br>1 | Hydroxysafflor Yellow<br>A | CA1     | P00915 |
| beta-sitosterol | SLC6<br>A2  | P2397<br>5 | Hydroxysafflor Yellow<br>A | CA3     | P07451 |
| beta-sitosterol | BCHE        | P0627      | Hydroxysafflor Yellow      | CA12    | O43570 |

|            |             |            |                            |          |        |
|------------|-------------|------------|----------------------------|----------|--------|
|            |             | 6          | A                          |          |        |
| kaempferol | NOX4        | Q9NP<br>H5 | Hydroxysafflor Yellow<br>A | CA14     | Q9ULX7 |
| kaempferol | AKR1<br>B1  | P1512<br>1 | Hydroxysafflor Yellow<br>A | CA9      | Q16790 |
| kaempferol | XDH         | P4798<br>9 | Hydroxysafflor Yellow<br>A | CA4      | P22748 |
| kaempferol | TYR         | P1467<br>9 | Hydroxysafflor Yellow<br>A | CA13     | Q8N1Q1 |
| kaempferol | FLT3        | P3688<br>8 | Hydroxysafflor Yellow<br>A | CA5A     | P35218 |
| kaempferol | CA2         | P0091<br>8 | Hydroxysafflor Yellow<br>A | PRKCD    | Q05655 |
| kaempferol | ALO<br>X5   | P0991<br>7 | Hydroxysafflor Yellow<br>A | PTPN1    | P18031 |
| kaempferol | CA7         | P4316<br>6 | Stigmasterol               | CYP51A1  | Q16850 |
| kaempferol | HSD1<br>7B2 | P3705<br>9 | Stigmasterol               | HMGCR    | P04035 |
| kaempferol | ABCC<br>1   | P3352<br>7 | Stigmasterol               | NR1H3    | Q13133 |
| kaempferol | HSD1<br>7B1 | P1406<br>1 | Stigmasterol               | NPC1L1   | Q9UHC9 |
| kaempferol | AHR         | P3586<br>9 | Stigmasterol               | CYP17A1  | P05093 |
| kaempferol | CA12        | O4357<br>0 | Stigmasterol               | AR       | P10275 |
| kaempferol | ESRR<br>A   | P1147<br>4 | Stigmasterol               | SREBF2   | Q12772 |
| kaempferol | ABCB<br>1   | P0818<br>3 | Stigmasterol               | CYP19A1  | P11511 |
|            |             |            | Stigmasterol               | RORC     | P51449 |
|            |             |            | Stigmasterol               | ESR1     | P03372 |
|            |             |            | Stigmasterol               | ESR2     | Q92731 |
|            |             |            | Stigmasterol               | SHBG     | P04278 |
|            |             |            | Stigmasterol               | SLC6A2   | P23975 |
|            |             |            | Stigmasterol               | SERPINA6 | P08185 |
|            |             |            | Stigmasterol               | PTPN1    | P18031 |

**Table S2. The disease targets of liver fibrosis.**

| Targets | Targets | Targets  |
|---------|---------|----------|
| HMGCR   | HSD11B1 | SELL     |
| CYP51A1 | F2      | SELE     |
| AR      | PRSS1   | SELP     |
| NPC1L1  | CTRC    | MMP13    |
| NR1H3   | PTPN1   | MMP1     |
| CYP17A1 | CDC25A  | MMP2     |
| RORC    | TOP2A   | MMP14    |
| CYP19A1 | ADORA1  | MMP8     |
| ESR2    | ADORA2A | MAOB     |
| ESR1    | SPHK2   | PTGS1    |
| SHBG    | RBP4    | CBR1     |
| SREBF2  | PPARA   | MAPT     |
| CYP2C19 | DNM1    | GPR35    |
| BCHE    | HDAC1   | INSR     |
| VDR     | HDAC4   | GLO1     |
| ALOX5   | CNR1    | MYLK     |
| PRKCB   | FAAH    | PIK3CG   |
| GLS     | KDR     | CYP11B2  |
| ACHE    | FGFR1   | HSP90AA1 |
| BCL2    | PLA2G2A | GSK3B    |
| ENPP2   | CAPN1   | SIRT2    |
| CHRM3   | MAPK8   | ASAH1    |
| FAP     | MAPK10  | CISD1    |
| EZR     | CTSL    | HTR2B    |
| ABCB1   | PARP1   | RXRΒ     |
| PTGS2   | CTSB    | RARB     |
| ABCC1   | PPARG   | TNF      |
| PREP    | AKR1B1  | IL2      |
| MET     | NOX4    | RPS6KA3  |
| HTR2A   | XDH     | EGFR     |
| NR3C1   | FLT3    | ALDH2    |
| PDE5A   | CA2     | TYR      |
| SYK     | CA12    | AHR      |
| CYP2C9  | CYP1B1  | SERPINA6 |
| TRPV1   | ABCG2   | APP      |
| MTOR    | PFKFB3  | SLC6A4   |
| PIK3CA  | CDK1    | AVPR2    |
| CYP3A4  | CA4     | IGF1R    |
| BRD2    | IGFBP3  | AURKB    |
| CDK2    | CAMKK2  |          |
| PRKCD   | CA9     |          |
